# Supplementary material
Source: PubMed Central journal article supplement (PMC3843956)

M-Wnt

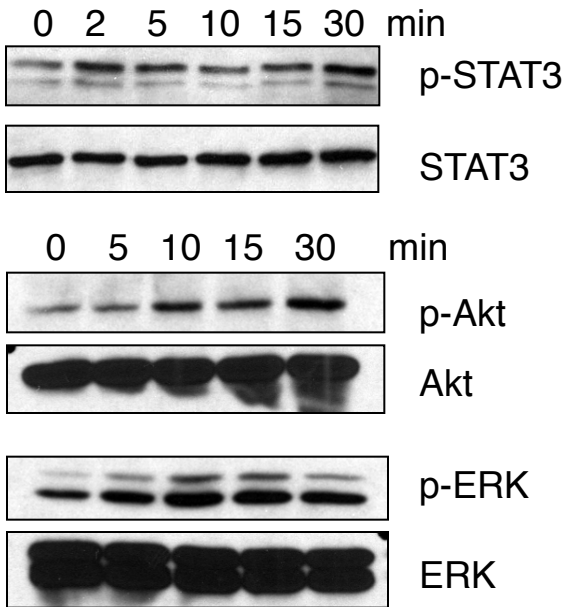

Supplement: NIHMS526179-supplement-3.pdf [file NIHMS526179-supplement-3.pdf]

MDA-MB-231

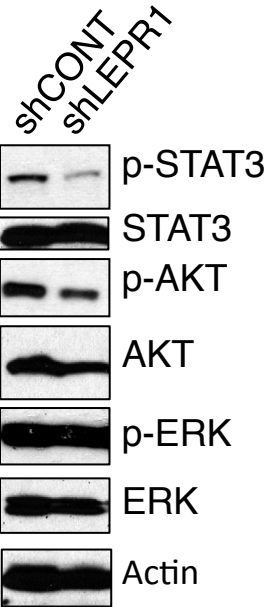

Supplement: NIHMS526179-supplement-4.pdf [file NIHMS526179-supplement-4.pdf]

## M-Wnt

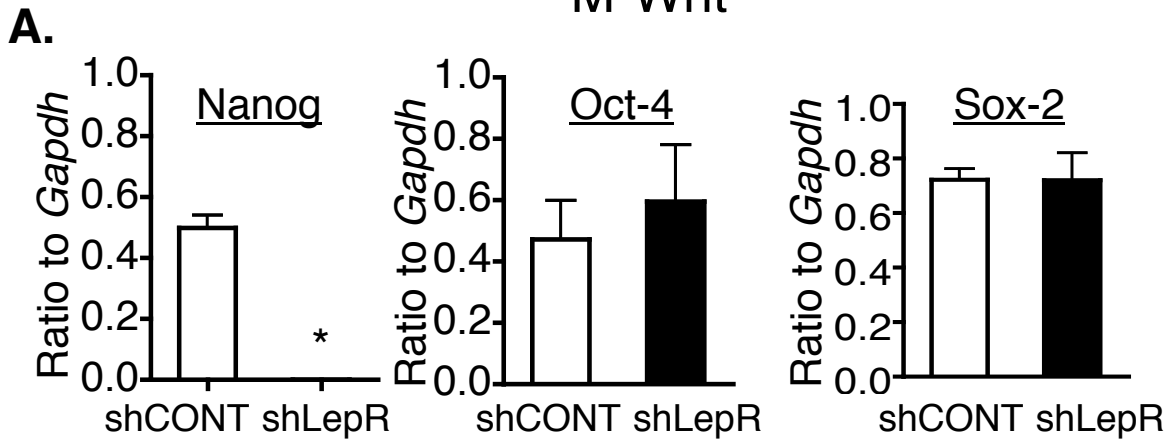

**B.**

MDA-MB-231

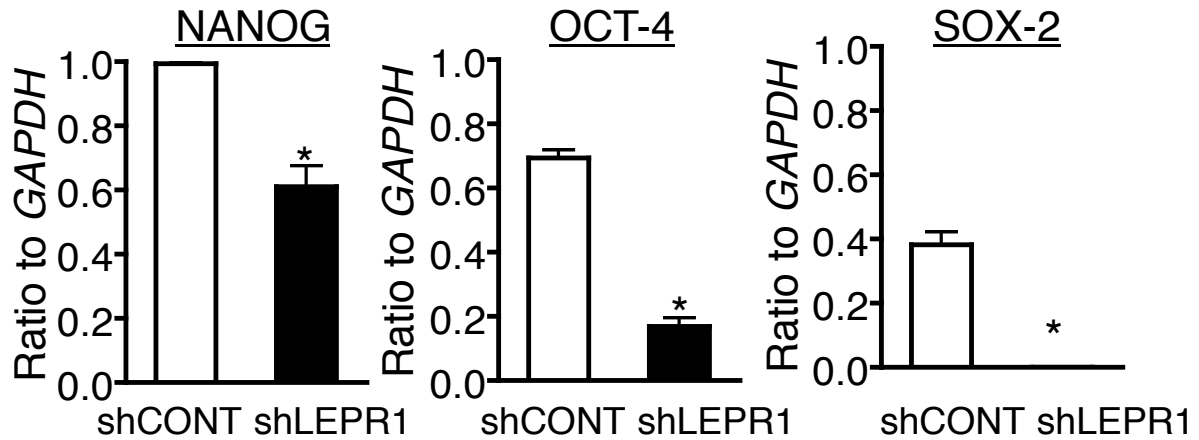

Supplement: NIHMS526179-supplement-5.pdf [file NIHMS526179-supplement-5.pdf]

MDA-MB-231

shCONT  
shLEPR2

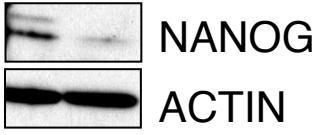

Supplement: NIHMS526179-supplement-6.pdf [file NIHMS526179-supplement-6.pdf]

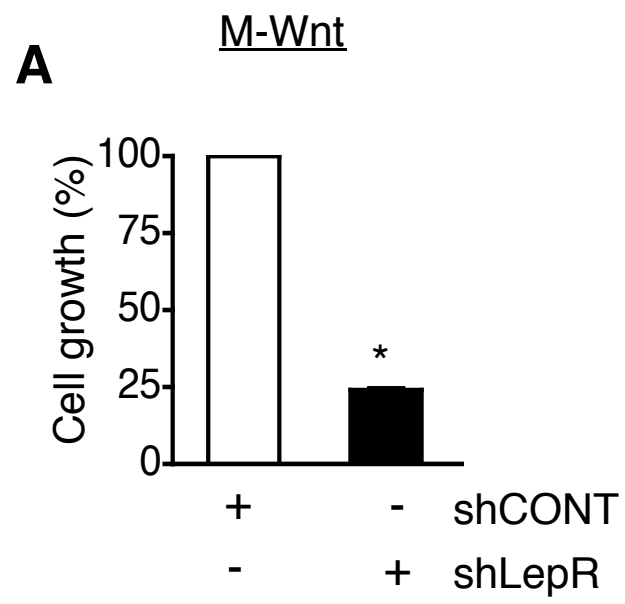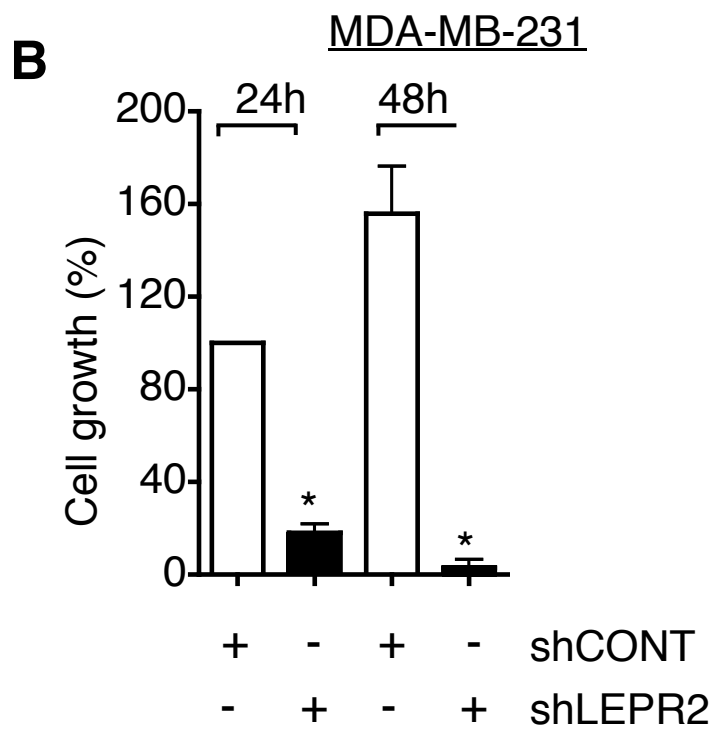

Supplement: NIHMS526179-supplement-7.pdf [file NIHMS526179-supplement-7.pdf]
